# Supplementary material for: Glycine cleavage system determines the fate of pluripotent stem cells via the regulation of senescence and epigenetic modifications
Source: Life Sci Alliance. 2019 Sep 27;2(5):e201900413. doi: 10.26508/lsa.201900413 (PMC6765226; doi:10.26508/lsa.201900413)
Supplement: Supplementary file 15 [file LSA-2019-00413_TableS5.xls]

## Sheet: Sheet1
Supplementary Table 5. Nucleotide Sequence of Primers Used for ChIP-qPCR
Name	Sequence of Primer
ChIP primers for Sox2 binding site	Forward: ATTGCTACAGGAAGCACATATTTAGG
	Reverse: TGCAGCAGACTCTGGTTTAGGA
ChIP primers for CTR site	Forward: GAGTTTAAAAGAAGAACTTCAGGTCC
	Reverse: TCTAGGGTTGTGTCTTAGGGT
Name	Sequence of Forward Primer	Sequence of Reverse Primer
ChIP-Oct4	GGACTAGAACCCAGAATT GCAAGA	GTACAGACAGTGATGGCATGAAGC
ChIP-Sox2	AAGCGGCCGTTCATCGA	TATAATCCGGGTGCTCCTTCA
ChIP-Klf4	GGTTTTGGTTTGAGGTTTTGTTTC	TTCTGTTCCCAAGTCCAACATCT
ChIP-Nanog	TGTGAGCTCAGTGCTCCTTCCAAA	TTCAGACCTTGGCTCCAGATGCTA
